# Supplementary material for: Adapterama I: universal stubs and primers for 384 unique dual-indexed or 147,456 combinatorially-indexed Illumina libraries (iTru & iNext)
Source: PeerJ journal article supplement (doi:10.7717/peerj.7755), 2019-10-11
Supplement: Figure_S9.pdf [file Figure_S9.pdf]

Reads

1,200,000  
1,000,000  
800,000  
600,000

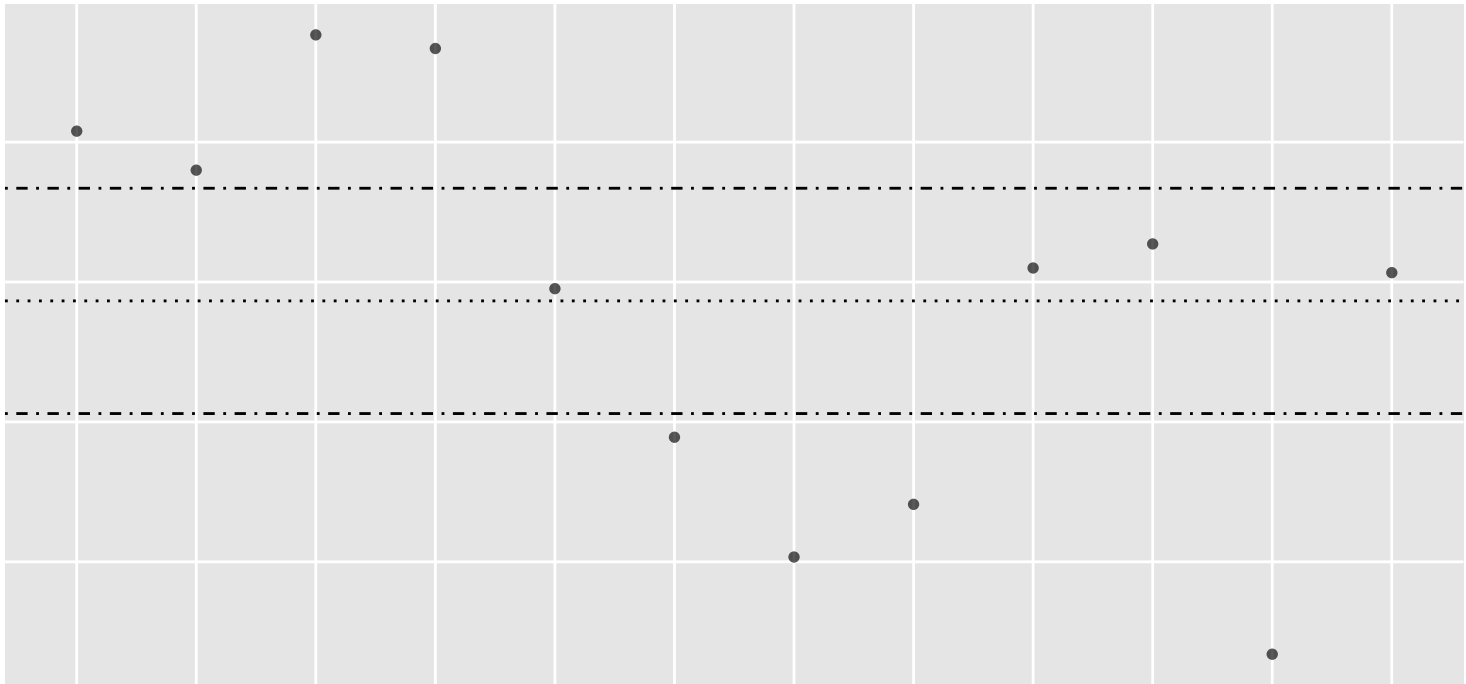

iTru\_01 iTru\_02 iTru\_03 iTru\_04 iTru\_05 iTru\_06 iTru\_07 iTru\_08 iTru\_09 iTru\_10 iTru\_11 iTru\_12

Library
