# Supplementary material for: Adapterama I: universal stubs and primers for 384 unique dual-indexed or 147,456 combinatorially-indexed Illumina libraries (iTru & iNext)
Source: PeerJ journal article supplement (doi:10.7717/peerj.7755), 2019-10-11

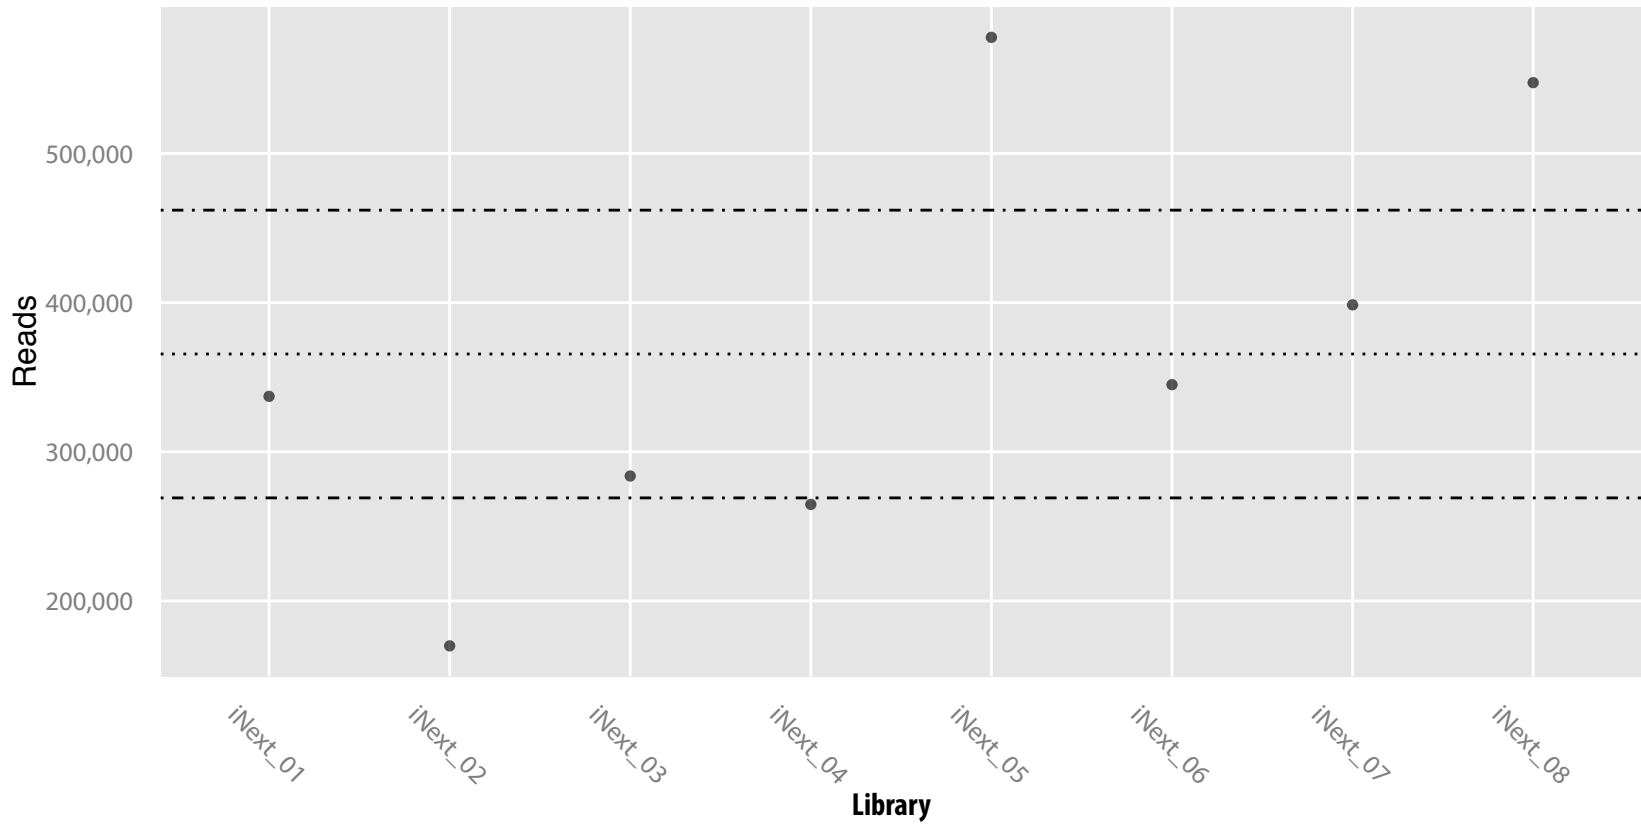

Supplement: Figure_S15.pdf [file Figure_S15.pdf]
