# Supplementary material for: Adapterama I: universal stubs and primers for 384 unique dual-indexed or 147,456 combinatorially-indexed Illumina libraries (iTru & iNext)
Source: PubMed Central journal article supplement (PMC6791352; doi:10.7717/peerj.7755), 2019-10-11

# Double Index 2-Step Library Method

Input DNA sample

1) Attach application-specific stubs

2) Use limited cycle PCR to add indexes and extend adapters

Full-length & double indexed

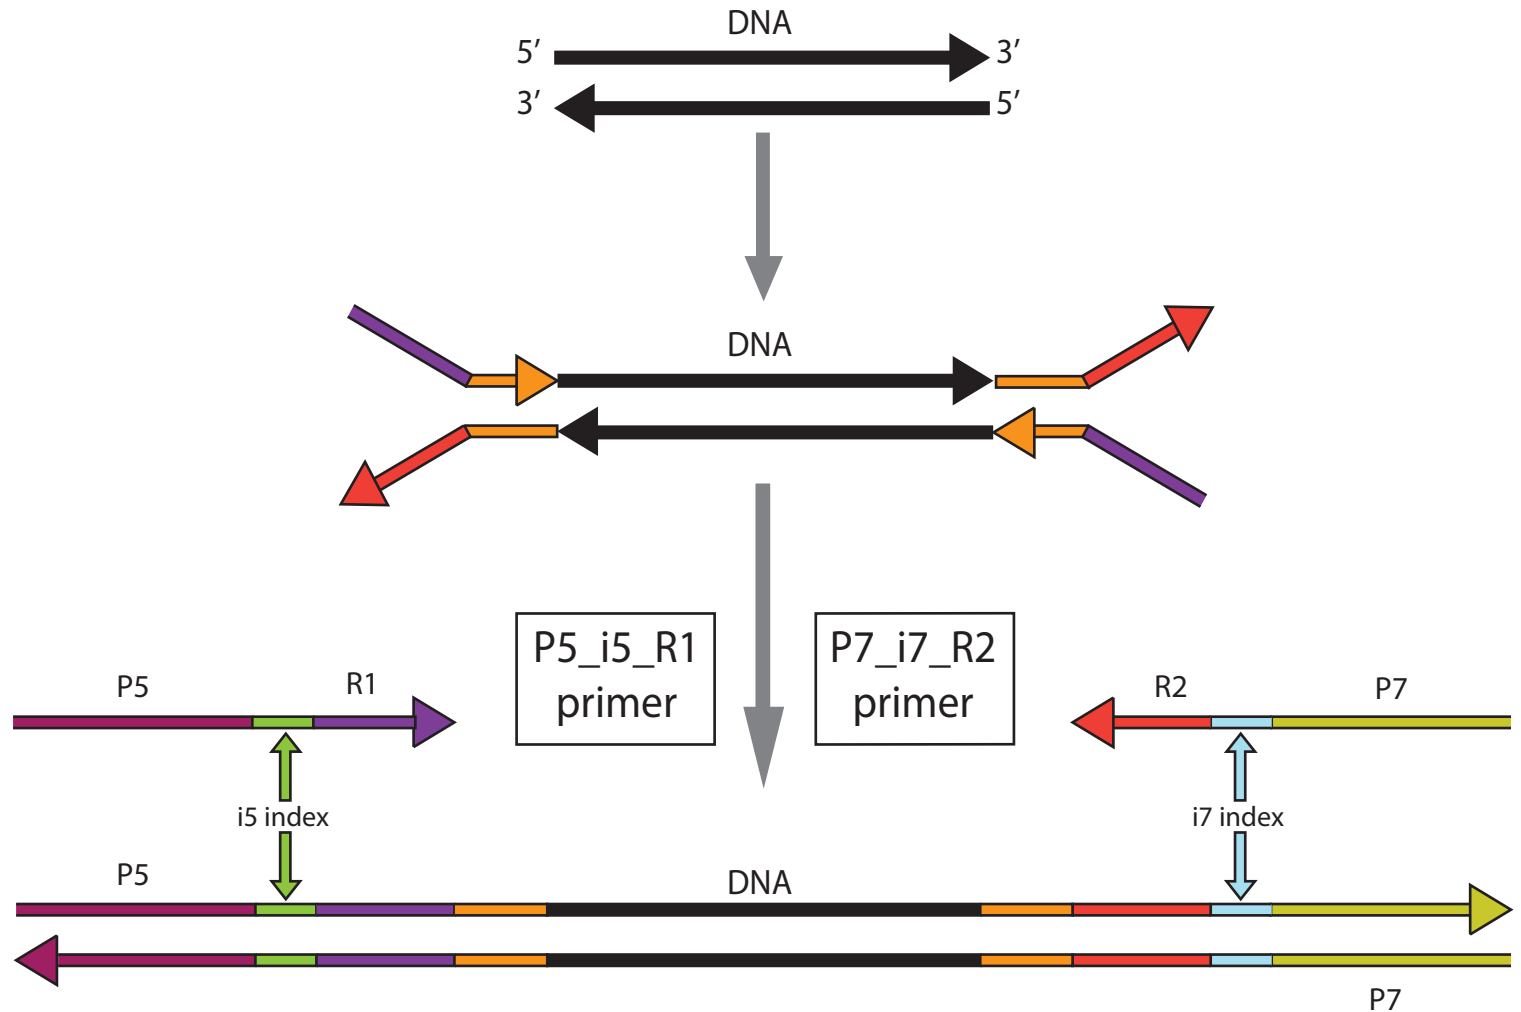

Supplement: peerj-07-7755-s001.pdf [file peerj-07-7755-s001.pdf]
