# Supplementary material for: Adapterama I: universal stubs and primers for 384 unique dual-indexed or 147,456 combinatorially-indexed Illumina libraries (iTru & iNext)
Source: PubMed Central journal article supplement (PMC6791352; doi:10.7717/peerj.7755), 2019-10-11

# iNext Library Method

Fragmented  
DNA sample

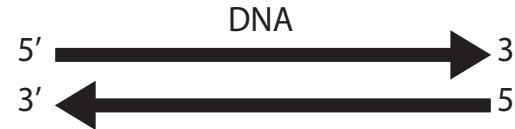

C/G  
overhangs  
not shown

Ligate stubby  
Y-yoke adapters

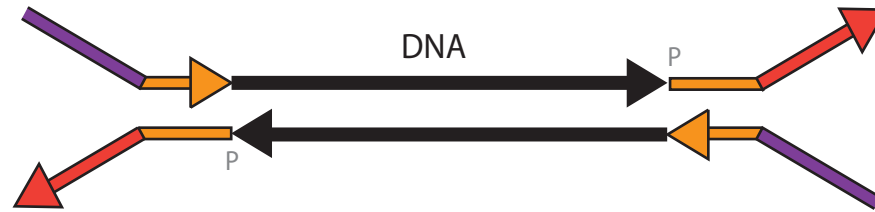

Limited cycle PCR

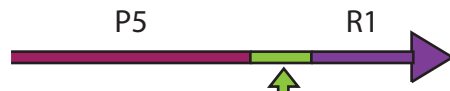

iNext5  
primer

iNext7  
primer

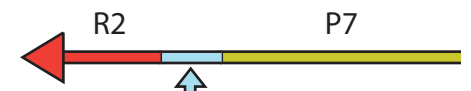

Full-length &  
double indexed

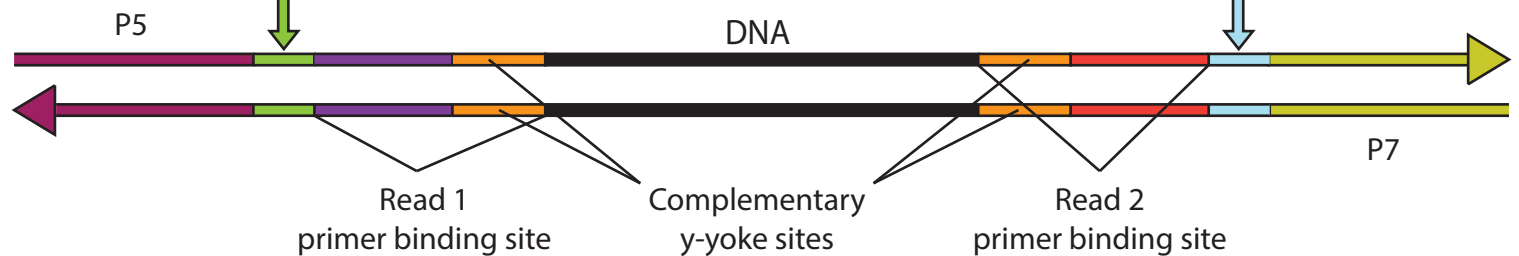

Supplement: peerj-07-7755-s002.pdf [file peerj-07-7755-s002.pdf]
