# Supplementary material for: Adapterama I: universal stubs and primers for 384 unique dual-indexed or 147,456 combinatorially-indexed Illumina libraries (iTru & iNext)
Source: PubMed Central journal article supplement (PMC6791352; doi:10.7717/peerj.7755), 2019-10-11

# Addition of Double-Index with PCR

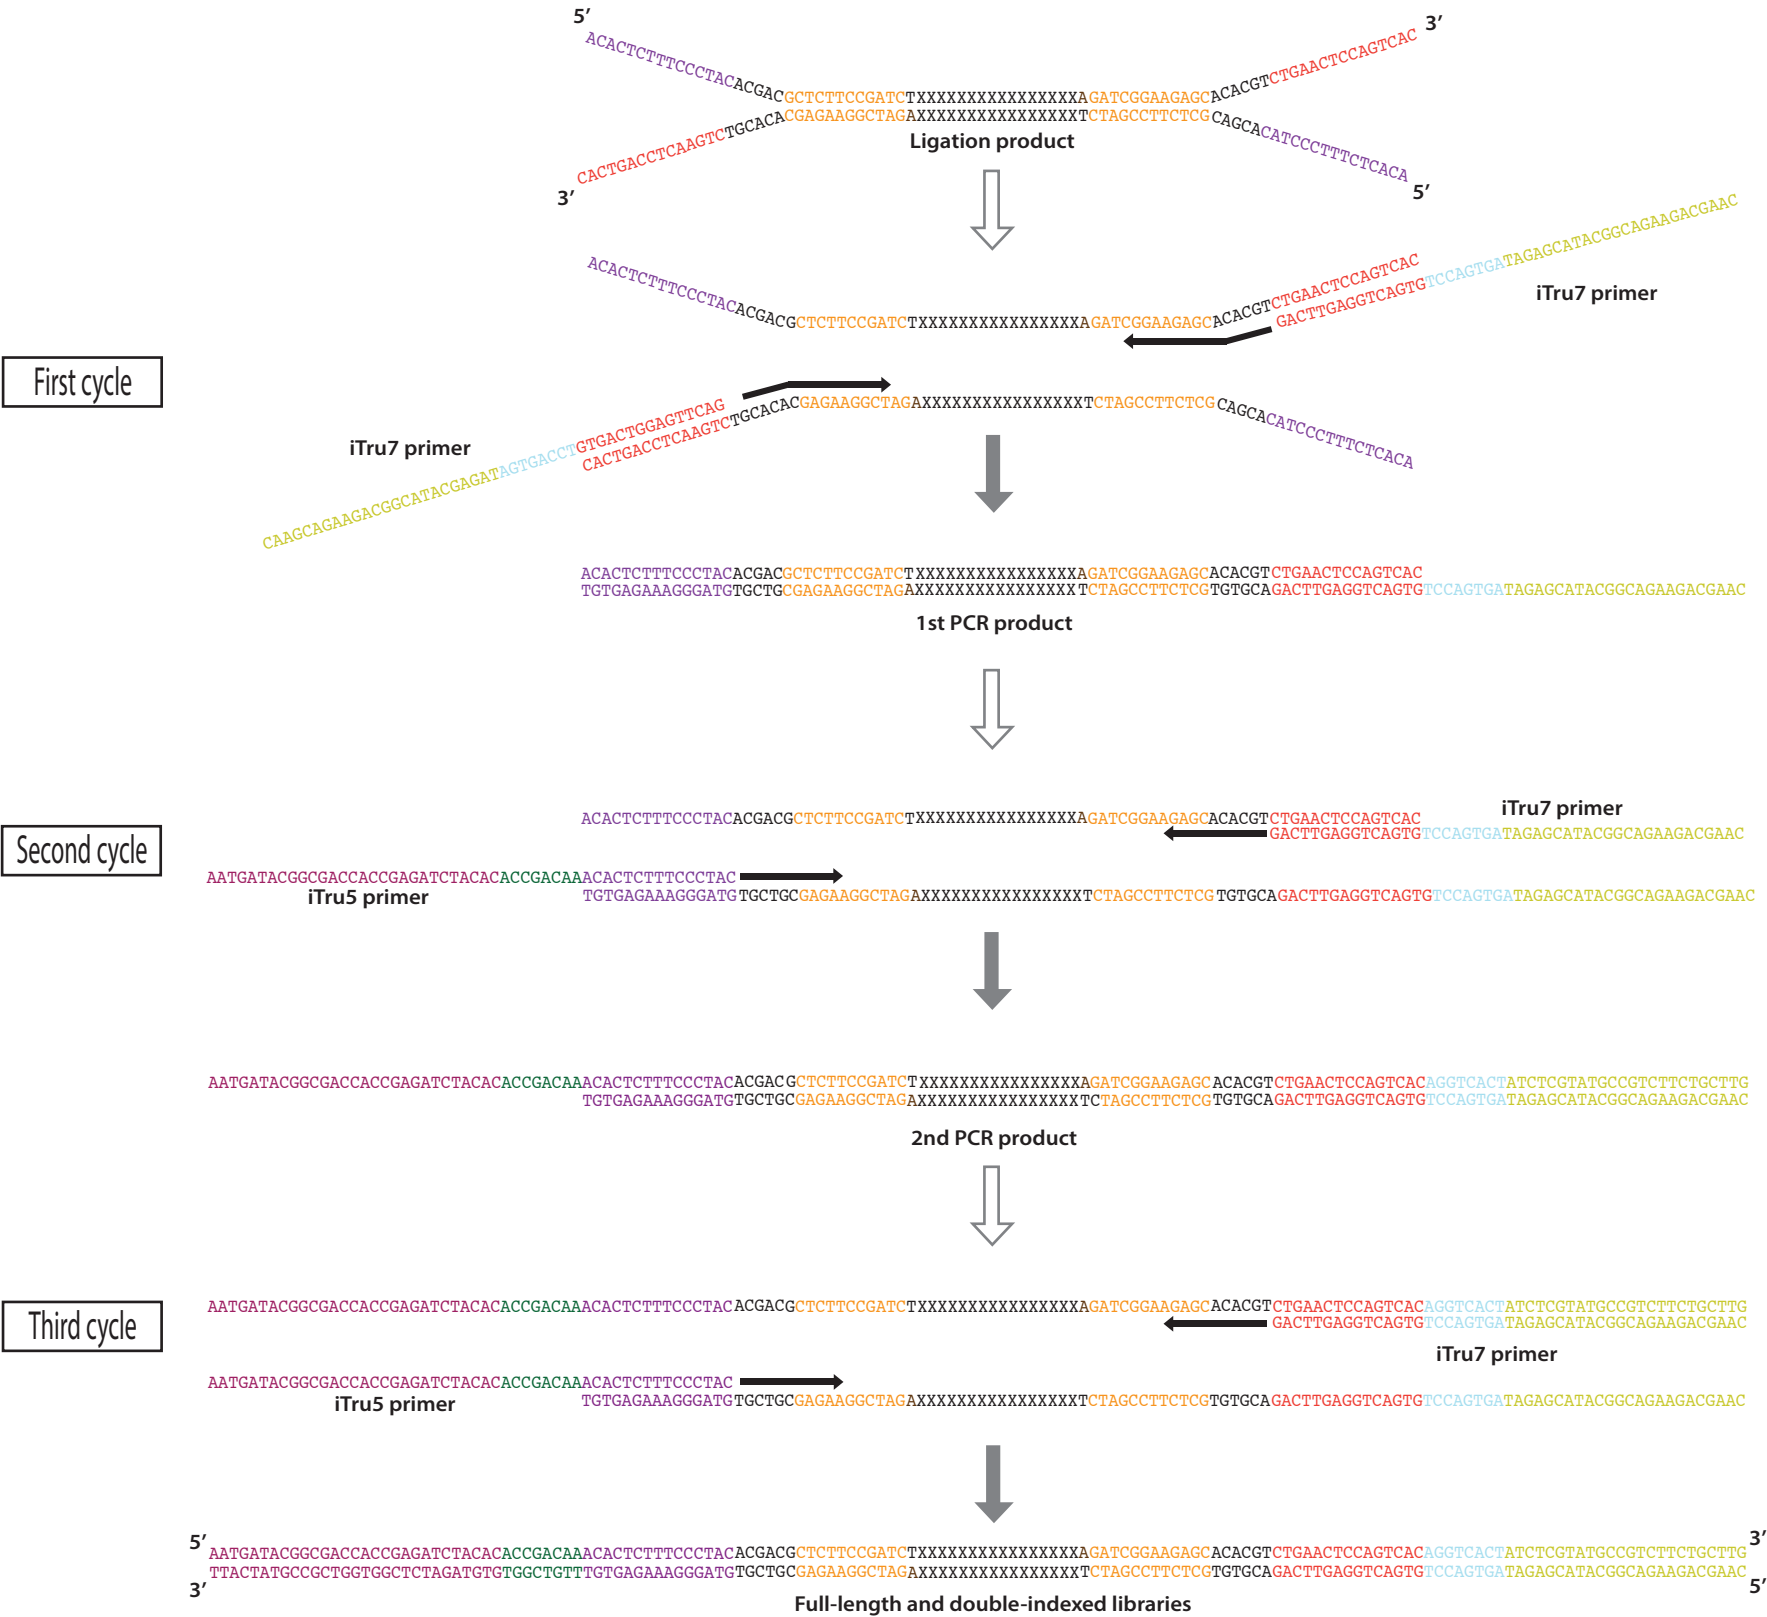

Supplement: peerj-07-7755-s003.pdf [file peerj-07-7755-s003.pdf]
