# Supplementary material for: Adapterama I: universal stubs and primers for 384 unique dual-indexed or 147,456 combinatorially-indexed Illumina libraries (iTru & iNext)
Source: PubMed Central journal article supplement (PMC6791352; doi:10.7717/peerj.7755), 2019-10-11

# Complete Library Molecule TruSeq (iTru) vs. Nextera (iNext)

**iTru**

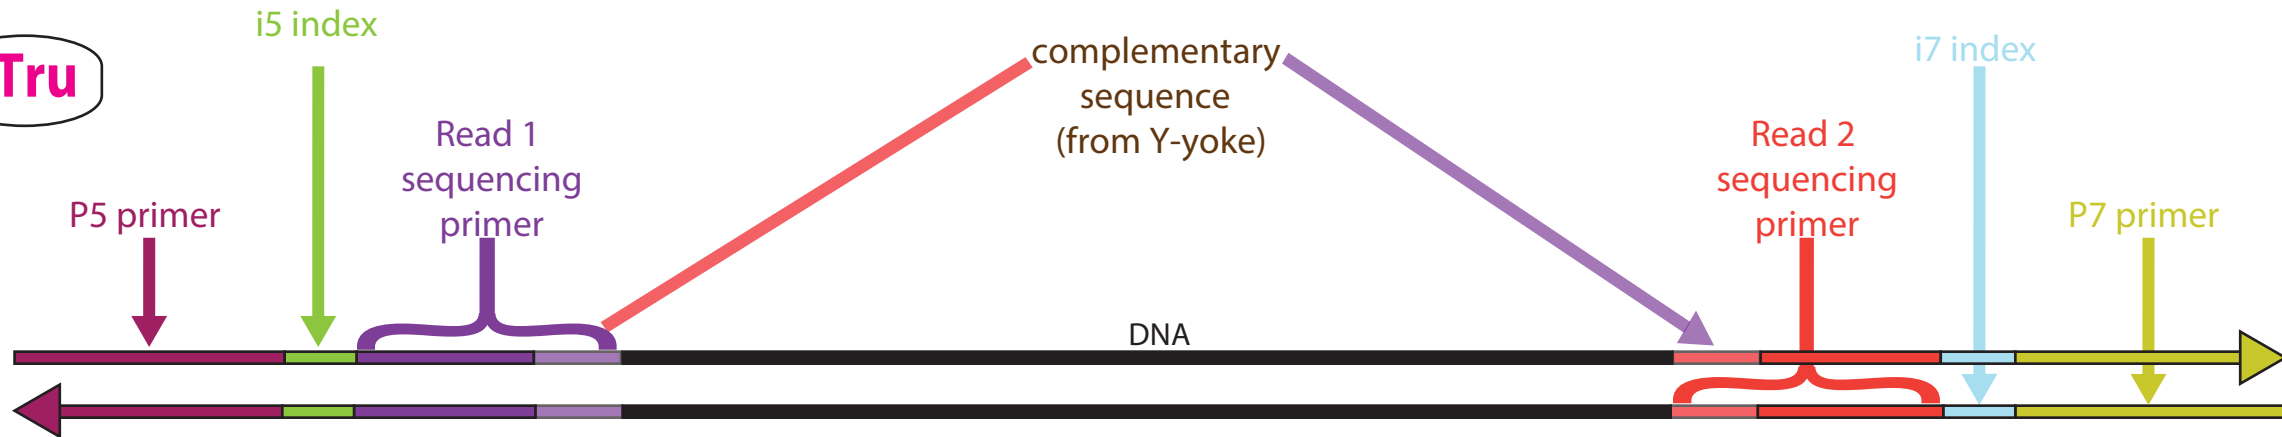

**iNext**

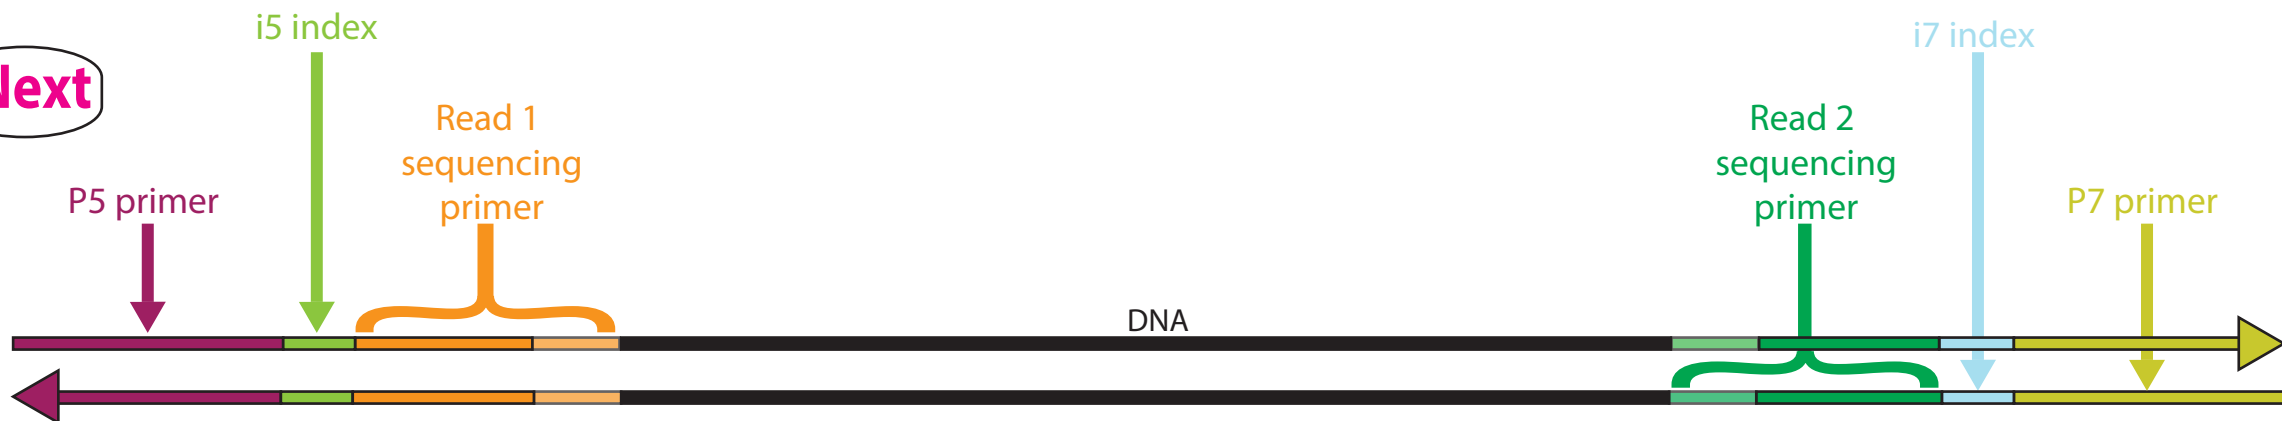

Supplement: peerj-07-7755-s004.pdf [file peerj-07-7755-s004.pdf]
