# Supplementary material for: Adapterama I: universal stubs and primers for 384 unique dual-indexed or 147,456 combinatorially-indexed Illumina libraries (iTru & iNext)
Source: PubMed Central journal article supplement (PMC6791352; doi:10.7717/peerj.7755), 2019-10-11
Supplement: peerj-07-7755-s005.pdf [file peerj-07-7755-s005.pdf]

|       | D701 | D702 | D703 | D704 | D705 | D706 | D707 | D708 | D709 | D710 | D711 | D712 | TS-1 | TS-2 | TS-3 | TS-4 | TS-5 | TS-6 | TS-7 | TS-8 | TS-9 | TS-10 | TS-11 | TS-12 | TS-13 | TS-14 | TS-15 | TS-16 | TS-18 | TS-19 | TS-20 | TS-21 | TS-22 | TS-23 | TS-25 | TS-27 |   |
|-------|------|------|------|------|------|------|------|------|------|------|------|------|------|------|------|------|------|------|------|------|------|-------|-------|-------|-------|-------|-------|-------|-------|-------|-------|-------|-------|-------|-------|-------|---|
| D701  | -    | -    | -    | -    | -    | -    | -    | -    | -    | -    | -    | -    | -    | -    | -    | -    | -    | -    | -    | -    | -    | -     | -     | -     | -     | -     | -     | -     | -     | -     | -     | -     | -     | -     | -     | -     | - |
| D702  | 7    | -    | -    | -    | -    | -    | -    | -    | -    | -    | -    | -    | -    | -    | -    | -    | -    | -    | -    | -    | -    | -     | -     | -     | -     | -     | -     | -     | -     | -     | -     | -     | -     | -     | -     | -     | - |
| D703  | 7    | 6    | -    | -    | -    | -    | -    | -    | -    | -    | -    | -    | -    | -    | -    | -    | -    | -    | -    | -    | -    | -     | -     | -     | -     | -     | -     | -     | -     | -     | -     | -     | -     | -     | -     | -     | - |
| D704  | 5    | 8    | 6    | -    | -    | -    | -    | -    | -    | -    | -    | -    | -    | -    | -    | -    | -    | -    | -    | -    | -    | -     | -     | -     | -     | -     | -     | -     | -     | -     | -     | -     | -     | -     | -     | -     | - |
| D705  | 5    | 4    | 6    | 7    | -    | -    | -    | -    | -    | -    | -    | -    | -    | -    | -    | -    | -    | -    | -    | -    | -    | -     | -     | -     | -     | -     | -     | -     | -     | -     | -     | -     | -     | -     | -     | -     | - |
| D706  | 5    | 7    | 6    | 3    | 5    | -    | -    | -    | -    | -    | -    | -    | -    | -    | -    | -    | -    | -    | -    | -    | -    | -     | -     | -     | -     | -     | -     | -     | -     | -     | -     | -     | -     | -     | -     | -     | - |
| D707  | 5    | 5    | 6    | 5    | 5    | 5    | -    | -    | -    | -    | -    | -    | -    | -    | -    | -    | -    | -    | -    | -    | -    | -     | -     | -     | -     | -     | -     | -     | -     | -     | -     | -     | -     | -     | -     | -     | - |
| D708  | 5    | 5    | 7    | 4    | 6    | 3    | 5    | -    | -    | -    | -    | -    | -    | -    | -    | -    | -    | -    | -    | -    | -    | -     | -     | -     | -     | -     | -     | -     | -     | -     | -     | -     | -     | -     | -     | -     | - |
| D709  | 6    | 6    | 3    | 6    | 7    | 6    | 6    | 7    | -    | -    | -    | -    | -    | -    | -    | -    | -    | -    | -    | -    | -    | -     | -     | -     | -     | -     | -     | -     | -     | -     | -     | -     | -     | -     | -     | -     | - |
| D710  | 6    | 2    | 6    | 8    | 4    | 7    | 6    | 5    | 5    | -    | -    | -    | -    | -    | -    | -    | -    | -    | -    | -    | -    | -     | -     | -     | -     | -     | -     | -     | -     | -     | -     | -     | -     | -     | -     | -     | - |
| D711  | 5    | 4    | 6    | 7    | 6    | 6    | 5    | 3    | 7    | 3    | -    | -    | -    | -    | -    | -    | -    | -    | -    | -    | -    | -     | -     | -     | -     | -     | -     | -     | -     | -     | -     | -     | -     | -     | -     | -     | - |
| D712  | 5    | 5    | 5    | 5    | 5    | 6    | 6    | 7    | 4    | 5    | 7    | -    | -    | -    | -    | -    | -    | -    | -    | -    | -    | -     | -     | -     | -     | -     | -     | -     | -     | -     | -     | -     | -     | -     | -     | -     | - |
| TS-1  | 4    | 5    | 5    | 7    | 3    | 5    | 4    | 6    | 6    | 4    | 5    | 5    | -    | -    | -    | -    | -    | -    | -    | -    | -    | -     | -     | -     | -     | -     | -     | -     | -     | -     | -     | -     | -     | -     | -     | -     |   |
| TS-2  | 6    | 6    | 4    | 5    | 7    | 5    | 4    | 5    | 4    | 6    | 7    | 5    | 5    | -    | -    | -    | -    | -    | -    | -    | -    | -     | -     | -     | -     | -     | -     | -     | -     | -     | -     | -     | -     | -     | -     | -     | - |
| TS-3  | 5    | 5    | 6    | 7    | 5    | 5    | 4    | 4    | 5    | 5    | 5    | 6    | 4    | 4    | -    | -    | -    | -    | -    | -    | -    | -     | -     | -     | -     | -     | -     | -     | -     | -     | -     | -     | -     | -     | -     | -     | - |
| TS-4  | 6    | 6    | 4    | 6    | 6    | 6    | 5    | 6    | 5    | 5    | 6    | 5    | 4    | 4    | 5    | -    | -    | -    | -    | -    | -    | -     | -     | -     | -     | -     | -     | -     | -     | -     | -     | -     | -     | -     | -     | -     | - |
| TS-5  | 6    | 5    | 5    | 6    | 5    | 5    | 5    | 6    | 5    | 4    | 6    | 5    | 3    | 4    | 4    | 5    | -    | -    | -    | -    | -    | -     | -     | -     | -     | -     | -     | -     | -     | -     | -     | -     | -     | -     | -     | -     | - |
| TS-6  | 6    | 5    | 4    | 5    | 6    | 5    | 5    | 7    | 5    | 5    | 7    | 4    | 4    | 4    | 5    | 5    | 6    | -    | -    | -    | -    | -     | -     | -     | -     | -     | -     | -     | -     | -     | -     | -     | -     | -     | -     | -     | - |
| TS-7  | 6    | 6    | 3    | 4    | 6    | 4    | 4    | 5    | 4    | 6    | 7    | 5    | 5    | 3    | 6    | 5    | 3    | 6    | -    | -    | -    | -     | -     | -     | -     | -     | -     | -     | -     | -     | -     | -     | -     | -     | -     | -     | - |
| TS-8  | 5    | 5    | 5    | 7    | 4    | 5    | 4    | 6    | 6    | 5    | 5    | 5    | 4    | 4    | 4    | 5    | 3    | 5    | 5    | -    | -    | -     | -     | -     | -     | -     | -     | -     | -     | -     | -     | -     | -     | -     | -     | -     | - |
| TS-9  | 6    | 6    | 4    | 6    | 3    | 4    | 5    | 6    | 6    | 6    | 6    | 5    | 2    | 4    | 4    | 5    | 6    | 3    | 4    | 6    | -    | -     | -     | -     | -     | -     | -     | -     | -     | -     | -     | -     | -     | -     | -     | -     | - |
| TS-10 | 6    | 6    | 4    | 4    | 6    | 5    | 6    | 6    | 4    | 5    | 6    | 4    | 5    | 4    | 6    | 4    | 4    | 6    | 3    | 4    | 6    | -     | -     | -     | -     | -     | -     | -     | -     | -     | -     | -     | -     | -     | -     | -     | - |
| TS-11 | 6    | 6    | 3    | 5    | 6    | 4    | 6    | 6    | 4    | 6    | 6    | 4    | 4    | 4    | 4    | 4    | 3    | 4    | 6    | 2    | 3    | 5     | -     | -     | -     | -     | -     | -     | -     | -     | -     | -     | -     | -     | -     | -     | - |
| TS-12 | 6    | 6    | 5    | 7    | 5    | 6    | 4    | 7    | 5    | 6    | 6    | 6    | 5    | 3    | 5    | 5    | 3    | 5    | 5    | 5    | 4    | 4     | 4     | -     | -     | -     | -     | -     | -     | -     | -     | -     | -     | -     | -     | -     | - |
| TS-13 | 5    | 6    | 5    | 6    | 3    | 7    | 5    | 6    | 5    | 6    | 6    | 4    | 4    | 6    | 5    | 3    | 4    | 4    | 4    | 5    | 5    | 4     | 4     | 5     | -     | -     | -     | -     | -     | -     | -     | -     | -     | -     | -     | -     | - |
| TS-14 | 4    | 7    | 4    | 4    | 4    | 3    | 6    | 5    | 6    | 6    | 5    | 6    | 4    | 5    | 4    | 4    | 4    | 5    | 3    | 4    | 4    | 4     | 4     | 5     | 5     | -     | -     | -     | -     | -     | -     | -     | -     | -     | -     | -     | - |
| TS-15 | 5    | 5    | 5    | 7    | 2    | 5    | 5    | 5    | 6    | 6    | 5    | 5    | 4    | 5    | 5    | 4    | 6    | 3    | 4    | 5    | 4    | 4     | 6     | 4     | 5     | 4     | -     | -     | -     | -     | -     | -     | -     | -     | -     | -     | - |
| TS-16 | 5    | 6    | 5    | 5    | 7    | 6    | 5    | 6    | 5    | 5    | 4    | 6    | 6    | 6    | 4    | 5    | 4    | 5    | 4    | 2    | 5    | 4     | 5     | 5     | 5     | 5     | 5     | -     | -     | -     | -     | -     | -     | -     | -     | -     | - |
| TS-18 | 6    | 4    | 6    | 6    | 5    | 6    | 6    | 5    | 6    | 3    | 3    | 6    | 4    | 6    | 6    | 5    | 6    | 4    | 5    | 5    | 5    | 6     | 4     | 6     | 5     | 5     | 5     | 5     | -     | -     | -     | -     | -     | -     | -     | -     | - |
| TS-19 | 4    | 7    | 7    | 4    | 6    | 5    | 3    | 5    | 5    | 7    | 6    | 4    | 6    | 6    | 6    | 5    | 6    | 7    | 4    | 4    | 4    | 5     | 4     | 6     | 5     | 3     | 5     | 6     | 4     | -     | -     | -     | -     | -     | -     | -     | - |
| TS-20 | 6    | 7    | 5    | 6    | 7    | 5    | 5    | 7    | 5    | 6    | 6    | 7    | 5    | 6    | 5    | 5    | 5    | 6    | 5    | 5    | 4    | 6     | 6     | 5     | 3     | 4     | 5     | 7     | 5     | 6     | -     | -     | -     | -     | -     | -     | - |
| TS-21 | 5    | 5    | 6    | 6    | 4    | 4    | 6    | 6    | 6    | 5    | 4    | 7    | 5    | 6    | 7    | 6    | 6    | 7    | 5    | 6    | 7    | 7     | 6     | 6     | 5     | 4     | 5     | 6     | 6     | 6     | 5     | -     | -     | -     | -     | -     | - |
| TS-22 | 5    | 5    | 4    | 7    | 5    | 5    | 5    | 6    | 5    | 5    | 6    | 5    | 5    | 3    | 4    | 5    | 6    | 5    | 6    | 6    | 4    | 6     | 4     | 6     | 4     | 5     | 5     | 5     | 6     | 5     | 5     | 4     | -     | -     | -     | -     | - |
| TS-23 | 7    | 6    | 6    | 5    | 5    | 4    | 5    | 5    | 6    | 6    | 7    | 5    | 5    | 3    | 6    | 5    | 7    | 5    | 6    | 6    | 5    | 7     | 5     | 5     | 4     | 6     | 5     | 5     | 5     | 7     | 6     | 4     | 6     | -     | -     | -     | - |
| TS-25 | 5    | 5    | 4    | 6    | 4    | 6    | 4    | 6    | 4    | 5    | 6    | 3    | 4    | 4    | 4    | 4    | 6    | 6    | 5    | 6    | 6    | 4     | 5     | 5     | 6     | 4     | 5     | 5     | 5     | 5     | 4     | 7     | 6     | 4     | -     | -     |   |
| TS-27 | 3    | 7    | 5    | 6    | 4    | 5    | 6    | 6    | 6    | 6    | 6    | 6    | 4    | 6    | 5    | 6    | 7    | 7    | 7    | 5    | 4    | 6     | 6     | 6     | 6     | 4     | 3     | 6     | 4     | 6     | 5     | 5     | 5     | 6     | 4     | -     |   |
